# Supplementary material for: A Novel Substance P-Based Hydrogel for Increased Wound Healing Efficiency
Source: MDPI journal article supplement (doi:10.3390/molecules23092215), 2018-08-31
Supplement: s1 [file s1]

## **Supplemental information**

### **Supplementary materials and methods**

#### *Analysis of SP stability in gel in cell growth medium FGM*

The stability of SP in the SP gel was analyzed in the fibroblast growth medium, FGM. SP (5 µg/ml) in PBS (SP alone) or in the gel form (SP gel) were stored in FGM at 37°C for up to 24 hours. Aliquots of the sample were removed at the indicated times and diluted in PBS for analysis of SP content by ELISA. A sample without incubation in FGM served as control.

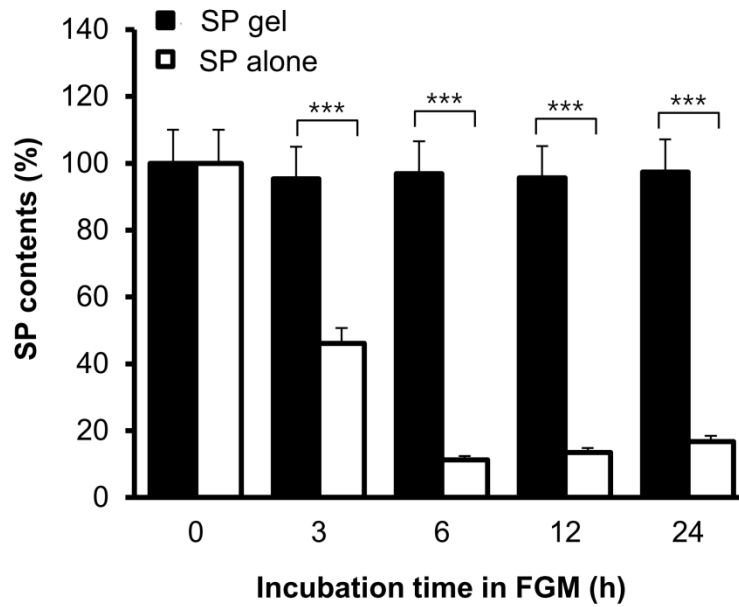

**Figure S1.** SP gel stability in FGM. SP alone or SP gel was stored in cell growth medium FGM for up to 24 hours. A sample at 0 hours without incubation in FGM served as control. The stability of SP alone and SP gel was analyzed by ELISA. Values represent mean  $\pm$  SD of three independent experiments. \*\*\* $P < 0.001$ .
